1 Running title: temperature aggravated plant allelopathy

2 **Temperature dependence of allelopathy duality and its influence on boreal forest**  
3 **succession-A case analysis of *Picea schrenkiana***

4

5 Xiao Ruan<sup>1</sup>, Li Yang<sup>1</sup>, Min-fen Yu<sup>3</sup>, Zhao-hui Li<sup>1</sup>, Ying-xian Zhao<sup>1</sup>, Cun-de Pan<sup>2</sup>, De-an  
6 Jiang<sup>1</sup>, Qiang Wang<sup>1\*</sup>

7 1. Ningbo Institute of Technology, Zhejiang University, Ningbo, 315100, P. R. [China](#) ;

8 [ruanxiao@nit.net.cn](mailto:ruanxiao@nit.net.cn), [yangli@nit.net.cn](mailto:yangli@nit.net.cn), [maylzh@126.com](mailto:maylzh@126.com), [zyx@nit.net.cn](mailto:zyx@nit.net.cn),

9 [dajiang@zju.edu.cn](mailto:dajiang@zju.edu.cn)

10 2. College of Forestry and Horticulture, Xinjiang Agricultural University, Ürümqi 830052, P.

11 R. China

12 3. Ningbo Forest Farm, Ningbo, 315440, P. R. China; [491856944@qq.com](mailto:491856944@qq.com)

13 **Corresponding author:** Qiang Wang; telephone: 86-13777135491; fax: 86-574-88229545;

14 e-mail details: [wangqiangsky@263.net](mailto:wangqiangsky@263.net); Cun-de Pan, e-mail details: [pancunde@163.com](mailto:pancunde@163.com)

15

16 The date of submission: January, 2019

17 The number of tables and figures: 7

18 The word count: 5388

19

20 **Highlight**

21 A quantitative description on the duality of 3, 4-dihydroxyacetophenone (DHAP) as a  
22 promoter or an inhibitor to affect the seed germination, seedling growth and root  
23 development of *P. schrenkiana*, as well as the antioxidant enzyme activities and hormone  
24 contents.

25 The new findings of DHAP inflection concentration as boundary to divide the  
26 promotional and inhibitory effect of allelopathy which would decrease as environment  
27 temperatures rise.

28 An explanation into the intrinsic mechanism of *P. schrenkiana* degradation due to  
29 allelopathy, and a new approach to explore the relationship between forest evolution and  
30 global warming.

31

32 **Abstract**

33 Global warming in conjunction with various biotic or abiotic interferences has been  
34 jeopardizing the ecosystem of boreal forests. By integrating field inspection with  
35 experimental simulation, this work comprehensively investigated the allelopathic effects of a  
36 key allelochemical 3,4-dihydroxyacetophenone (DHAP) in the exudates of *P. schrenkiana*  
37 needles on its seed and seedling growth, endogenous hormone metabolism and antioxidant  
38 enzyme activity, identified the existence of DHAP allelopathy duality at a certain temperature  
39 with an inflection concentration point (e.g. about 0.25 mM at dark/light temperature of  
40 4/12 °C) as the boundary between promotional and inhibitory effect, and verified that the  
41 inflection point of DHAP concentration would inevitably shift to a lower level as temperature  
42 increased. Consequently, this paper gives a scientific explanation into the intrinsic  
43 mechanism of *P. schrenkiana* degradation due to allelopathy, but also presents a new  
44 approach to explore the relationship between forest evolution and global warming.

45 **KEYWORDS**

46 Allelopathy duality, Boreal forest ecosystem, 3, 4-dihydroxyacetophenone (DHAP),  
47 Morphology and physiology, *Picea schrenkiana*, Temperature dependence

48

49 **Abbreviations**

50 DHAP 3, 4-dihydroxyacetophenone

51 FDA fluorescein diacetate

52 PI propidium iodide

53 ZT Zeatin

54 GA<sub>3</sub> Gibberellin

55 IAA Indoleacetic acid

56 ABA Abscisic acid

57 SOD Seroxide dismutase

58 POD Peroxidase

59 CAT Catalase

60 GR Glutathione reductase

61

62

63

## 64 **Introduction**

65 Allelopathy can be generally defined as a direct or indirect, promotional or inhibitory  
66 effect of a plant including microorganism on other plants or own through the release of  
67 chemicals in environment (Rice, 1984). There have been a lot of research reports about  
68 alleochemical production in woody species ranging from Eucalyptus sp. forest in Australia to  
69 boreal conifer forest, tropical forest, temperate forest and sub-desert zone communities  
70 (Mallik, 2008). Pellissier and Souto (1999) presented a detailed compilation of more than a  
71 hundred tree species with allelopathic activity in boreal forest. It has been recognized that  
72 allelochemicals could be released from plants into the environment through several ways  
73 such as volatilization, root exudation, decomposition and leaching to interfere the growth of  
74 adjacent plants (Subrahmaniam *et al.*, 2018). Some allelochemicals could increase cell  
75 membrane permeability (Bais *et al.*, 2003; Chai *et al.*, 2013), inhibit cell division and  
76 elongation, damage cell sumicroscopic structure (Teerarak *et al.*, 2012; Cheng *et al.*, 2016),  
77 disturb plant photosynthesis and respiration (Yu *et al.*, 2005), affect synthesis of plant  
78 endogenous hormones and proteins (Zeng *et al.*, 2001; Hu *et al.*, 2015), and so on. In  
79 consequence, allelopathy would potentially influence the growth and development of plants,  
80 succession of plant communities (Cummings *et al.*, 2012; Bonanomi *et al.*, 2018) and  
81 invasion of exotic plant into forest ecosystems (Meiners *et al.*, 2012). For the purpose of  
82 simulation analysis, Blanco (2007) developed a forest ecological-level model FORECAST in  
83 incorporating several aspects of allelopathy to demonstrate its potential consequences. Both  
84 field investigation and model simulation indicated that the early stages of plant growth were  
85 more fragile and sensitive to the changes in variety and quantity of allelochemicals than the  
86 adult stages, as such created a major bottleneck to plant propagation.

87 Depending on its concentration, an allelochemical can act as either a promoter or an  
88 inhibitor to plant growth. Such bidirectional behavior may be called as the duality of  
89 allelopathic effect. Our previous investigation on the autotoxic effects of *Picea schrenkiana*,  
90 the most representative species in boreal forest, has revealed that 3, 4-dihydroxy-  
91 acetophenone (DHAP) leached from *P. schrenkiana* needles could display a similar dual  
92 effect on the growth of its seedling (Ruan *et al.*, 2011). Specifically, DHAP could act as a  
93 promoter at lower concentrations (0.1 mM) but an inhibitor at higher concentration (0.5 mM),

94 and the concentration inflection point turning DHAP action direction would appear about  
95 0.25 mM at 4/12 °C. This inflection point would shift to a lower level as environmental  
96 temperature increased, which would generate some crucial effects on the early regeneration  
97 process of *P. schrenkiana* in boreal forest (Ruan *et al.*, 2016). In spite that the real existence  
98 of plant autotoxic duality has been gradually recognized, its temperature dependence and  
99 ecological significance to forest evolution still need to be fully understood.

100 Over the decades, climatic change in cooperation with other environmental stressors has  
101 been significantly influencing plant ecological behavior and successive propagation (Reich *et*  
102 *al.*, 2016; Vazquez *et al.*, 2017). The uncertainty of allelopathy induced by climate warming  
103 and its effect on boreal forest regeneration require further study. Focusing on the verification  
104 of allelopathy duality and its dependence on temperature, this work comprehensively  
105 investigates the allelopathy of DHAP to the regeneration of *P. schrenkiana* in boreal forest.  
106 In brief, a series of experiments including seed germination, seedling growth, root cell  
107 viability, antioxidant enzyme activities and plant endogenous hormones were conducted to  
108 reveal the variation of DHAP allelopathy to *P. schrenkiana* regeneration as environment  
109 temperature changed.

## 110 **Material and Methods**

### 111 **Geography, climate and ecosystem of the forest**

112 Boreal forests cross over Eurasian continent and account for about 30 % of the global  
113 forest area as displayed in Fig.1A. As one of the largest mountain ranges in central Asia,  
114 Tianshan Mountain occupies 800,000 km<sup>2</sup> between 69°-95° E and 39°-46° N, and stretches  
115 close to 2,500 km from southwest to northeast in one of the most arid mid-latitude zones on  
116 Earth. The forest on Tianshan Mountain range is located in a limited zone with altitudes  
117 between 2,700 m (the thermal tree line) and 1,500 m, and the brown soil is covered by a thick  
118 humus layer of litterfall over the years. The climate there is rather wet and warm, annually  
119 giving the mean temperature, precipitation, evaporation and relative humidity to be 2 °C,  
120 400-600 mm, 980-1,150 mm and 65 % respectively, while the aridity index and the frost-free  
121 period are 1.4 and 89 days respectively. This multilayered forest is inhabited by a variety of  
122 plants including various trees, shrubs, ferns, grasses, and moss. *P. schrenkiana* mingled with  
123 *Larix sibiricain* in the eastern region constitutes the major type of forest on Tianshan

124 Mountain. The dominant species of understory shrubs are *Juniperus pseudosabina* and  
125 *Juniperus Sabina*, and the main types of understory bryophytes consist of *Dicranum*  
126 *scoparium* and *Hepnum revolutumare*, while the herbs mainly include *Stellaria songorica*  
127 and *Cortusa brother*. In addition, the real-time monitoring of soil temperature with a total of  
128 sixty-nine sampling points from five field sites on the northern slopes of the Tianshan  
129 Mountains showed that during natural seasons for *P. schrenkiana* regeneration from 2003 to  
130 2012, the criterion day and night temperatures were 12 °C and 4 °C for seed germination, and  
131 14 °C and 6 °C for seedling growth, respectively (Ruan *et al.*, 2016).

132 Documentary records indicated that the distribution region and population scale of *P.*  
133 *schrenkiana* were very sensitive to climate change during prehistoric and historic periods. As  
134 known for long time, wildfire has played some important role in sustaining natural  
135 regeneration and evolution of forest ecosystem. It has been naturally observed that the  
136 sustainable circulation of *P. schrenkiana* ecosystem relied on wildfires to some extent (Zhang  
137 and Zhang 1963). As shown in Fig.1B, for example, the seedlings and saplings of *P.*  
138 *schrenkiana* only appeared on the burned down woods which experienced the third, fourth  
139 and fifth grades of decay respectively, suggesting that the decomposition of the fallen woods  
140 could be likely to circumvent or attenuate some negative effects on the seed germination and  
141 seedling growth of *P. schrenkiana*. Fig.1C displayed the regeneration of *P. schrenkiana* over  
142 two sporadic fire spots, Fig.1D and Fig.1E illustrated the regeneration status of *P.*  
143 *schrenkiana* in five and ten years after the wildfire event occurred respectively. Hereby, a  
144 wildfire burning might be appropriate or even beneficial to some forest ecosystems, probably  
145 because it could not only damage and even destroy plant morphological landscape, but also  
146 attenuate and even eliminate negative or toxic effects of some substances on ecological  
147 balance and evolution of forests. Previous investigation showed that water extract of *P.*  
148 *schrenkiana* needles exhibited autotoxic effects on seed germination and seedling growth  
149 (Ruan *et al.*, 2011; Yang *et al.*, 2017).

#### 150 **Collection of *P. schrenkiana* needles and cones**

151 The current-year needles and cones of *P. schrenkiana* were collected from those parent  
152 trees located at the XAU forest education center at 2,198 m altitude, 43°22'58" north latitude  
153 and 86°49'33" east longitude on September 12-15, 2007-2017. All the selected *P.*

154 *schrenkiana* plants were 30-35 m tall, 80-100 years old, healthy and infection free. After  
155 being collected, the cones were dried in paper bags at room temperature for 7 days and then  
156 threshed by hand to get seeds. According to the analyses, the chemical composition of  
157 needles and the vigor of seeds showed no difference for the selected plants from various areas  
158 (Li *et al.*, 2009).

### 159 **Extraction and isolation of the active components**

160 A certain amount of dry *P. schrenkiana* needles were ground and extracted with distilled  
161 water (20 mL per gram) at room temperature for 48 h. Subsequently, the water solution was  
162 extracted again with diethyl ether, ethyl acetate and *n*-butanol in turn. The obtained extracts  
163 were concentrated and then fractionated with a silica gel column chromatography to isolate  
164 active components. It was previously found that the fractionation of the concentrated diethyl  
165 ether extract finally gave a yellow crystal of 3, 4-dihydroxy-acetophenone (DHAP) with the  
166 strongest auto-toxicity, and the detailed information of experimental operation and  
167 identification has been previously described elsewhere (Ruan *et al.*, 2011).

### 168 **Bioassay procedure**

169 The stock solution of DHAP at 100 mM was prepared by dissolving pure DHAP in  
170 distilled water, and then diluted into the concentrations of 0.5, 0.25 and 0.1mM as treatment  
171 solutions and water as control for bioassays. Similarly, the water extraction solution of *P.*  
172 *schrenkiana* needles at 1.0 mg mL<sup>-1</sup> was prepared by dissolving the water extracts in distilled  
173 water, and then diluted to the concentrations of 0.1, 0.05, 0.01 mg mL<sup>-1</sup> for bioassays. The  
174 biological measurements of seed germination and seedling growth were conducted according  
175 to the procedure of ISTA (International Seed Testing Association, 1993).

### 176 **Measurement of the seed germination**

177 100 seeds of the surface-sterilized *P. schrenkiana* were first put into culture dishes  
178 (12×12 cm) lined with two layers of Whatman No 3 filter paper, and each dish was added  
179 with 10 mL treatment solution or control water. The seeds were incubated in an artificial  
180 intelligence simulation incubator under a 16/8 h (day/night) photo period with photon flux  
181 density of 40 μmol m<sup>-2</sup>s<sup>-1</sup> at a day/night temperature of 8/0 °C, 10/2 °C, 12/4 °C, 14/6 °C and  
182 16/8 °C, respectively. Treatments were conducted in a completely random manner and with  
183 five replicates for each. Once the radicle emerged after incubation, the seeds were considered  
184 to have germinated. The rate and vigor of germination were calculated after 15 days and on

185 the tenth day, respectively.

### 186 **Measurement of the seedling growth**

187 Replicated by five times, one hundred of the successfully germinated seeds were placed  
188 in Petri dishes and 10 mL treatment solution was added into each dish, and then the seedlings  
189 were incubated in an artificial intelligence simulation incubator under a 16/8 h (day/night)  
190 photo period with photon flux density of  $40 \mu\text{mol m}^{-2}\text{s}^{-1}$  at a day/night temperature of 10/2 °C,  
191 12/4 °C, 14/6 °C, 16/8 °C, and 18/10°C, respectively. After incubation, five seedlings were  
192 randomly sampled from each Petri dish, and the length of their shoots and roots was  
193 measured with a vernier caliper (GB/T 1214.2-1996, Measuring Instrument LTD, Shanghai).  
194 The weight of fresh seedlings was also recorded (Mettler Toledo instrument LTD, Switch).  
195 The measurements were taken on the third day after incubation, and continued once every 3  
196 day for a total of 30 days. After their radicle length and fresh weight measured, the seedlings  
197 were used to determine the activities of antioxidant enzymes and the levels of plant  
198 endogenous hormones.

### 199 **Measurement of the root cell viability of seedling**

200 The viability of *P. schrenkiana* root cell was determined by the method of double  
201 staining with fluorescein diacetate (FDA) and propidium iodide (PI) (Pan *et al.*, 2001). Root  
202 tissues (0.1-1 cm length from the tip) were excised from the intact seedlings with or without  
203 DHAP treatment, and then the staining process was performed and photographed using a  
204 fluorescence microscope (Nikon E600 with a B-2A filter, excitation 450-490 nm, emission at  
205 520 nm, Nikon Corp., Tokyo, Japan) according to the reported methods (Yang *et al.*, 2017).

### 206 **Assay of plant endogenous hormone contents**

207 Sample of *P. schrenkiana* seedlings (0.1 g) was ground in liquid nitrogen, dissolved with  
208 80% cold methanol (containing 1 mM BHT), and then temporarily incubated at 4°C in the  
209 dark for 12 h. After centrifugation at  $10,000 \text{ r}\cdot\text{min}^{-1}$  for 20 min at 4°C, the supernatants were  
210 prewashed with 80 % methanol, dried under  $\text{N}_2$  and then dissolved in 2 mL methanol for  
211 analysis. The contents of plant endogenous hormones were determined by a Agilent 1290  
212 UPLC (Ultra-high Performance Liquid Chromatography) system with a C18 reversed-phase  
213 column (2.1×150 mm, Agilent, Santa Clara, CA, USA) in accordance with the method  
214 described previously (Yang *et al.*, 2017). Zeatin (ZT), Gibberellin ( $\text{GA}_3$ ), Indoleacetic acid

215 (IAA) and Abscisic acid (ABA) and DHAP as reference materials were assayed by UPLC,  
216 and retention time of each compound was measured, as marked in the following bracket: ZT  
217 (1.52 min), DHAP (2.95 min), GA<sub>3</sub> (3.65 min), IAA (5.32 min), ABA (7.35 min),  
218 respectively (Fig. 2). The concentrations of plant endogenous hormones ( $\mu\text{g}\cdot\text{g}^{-1}$  fresh weight)  
219 were automatically calculated from peak area by software using authentic standard runs with  
220 the sample. All the calibration curves showed excellent linearity ( $R^2 > 0.999$ ) in a wide  
221 concentration range.

### 222 **Assay of antioxidant enzyme activities**

223 The antioxidant enzyme activities of *P. schrenkiana* seedling were analyzed by the  
224 standard methods and the procedures described previously (Yang *et al.*, 2017). In brief,  
225 Superoxide dismutase (SOD) activity was determined using the nitrobluetetrazolium (NBT)  
226 method, and one unit of the activity was defined as the amount to cause 50 % inhibition of  
227 NBT reduction (Giannopolitis and Ries 1977); Peroxidase (POD) activity was detected in  
228 accordance with the guaiacol method, and one unit of the activity was defined as the amount  
229 of 0.01 increase in the absorbance at 470 nm per min (Kochba *et al.*, 1977); Catalase (CAT)  
230 activity was determined according to the rate of H<sub>2</sub>O<sub>2</sub> decomposition as measured by the  
231 decrease of absorbance at 240 nm, and one unit of the activity was calculated as the amount  
232 of 0.01 decrease in absorbance at 240 nm per min (Zhang *et al.*, 1990); Glutathione reductase  
233 (GR) activity was assayed by following GSSG-dependent oxidation of NADPH, and one unit  
234 of the activity was expressed as 1  $\mu\text{M}$  NADPH oxidized per min (Lee *et al.*, 2001).

### 235 **Statistical analyses**

236 All results were presented as the mean  $\pm$  standard error of five replications. All data  
237 were statistically analyzed using SPSS software (IBM, New York, USA). For statistical  
238 analyses, relationships were considered to be significant when  $p < 0.05$ . If the results of  
239 One-way ANOVA showed the significant differences at the 0.05 significance level, LSD  
240 (Least Significance Difference) was adopted for multiple comparisons among the different  
241 treatments.

### 242 **Results**

243 The duality of allelopathy to boreal forest ecosystem depends on both allelochemical  
244 concentration and environmental temperature, which can be displayed by investigating the



245 effects of both the allelopathic mixture (water extract) and single key allelochemical (DHAP)  
246 in *P. schrenkiana* needles on phenotypic, morphologic and physiological characteristics of *P.*  
247 *schrenkiana* plant at various temperatures.

#### 248 **Dynamic variability of auto-allelopathic effect on the seed germination**

249 The auto-allelopathic effects of both the water extract of *P. schrenkiana* needles and  
250 single DHAP on the germination of *P. schrenkiana* seeds were investigated at three different  
251 concentrations and in five dark/light temperature cycles of 0/8, 2/10, 4/12, 6/14 and 8/16 °C.  
252 The experimental results ( $p < 0.05$ ) are illustrated by a set of diagrams in Fig. 3, in which the  
253 vertical axis represents the inhibition ratio as a percentage of the net change value divided by  
254 the intrinsic value, so that a positive, negative or zero value indicates an inhibition, promotion  
255 or no effect respectively. For either the extract or DHAP, low concentration enhanced the rate  
256 and vigor of seed germination but high concentration reduced the rate and vigor at any  
257 temperature cycles, while the intermediate concentration could alter the effect from  
258 promoting to inhibiting the seed germination as the temperature increased. At a given  
259 temperature, therefore, there always was an inflection point of concentration (threshold) for  
260 dividing the promotional and inhibitory effect on the seed germination, and increasing the  
261 temperature could shift the inflection point to a lower level. For the effect of DHAP on the  
262 rate and vigor of seed germination as an example, the inflection concentration point shifted  
263 from higher than 0.25 mM to much lower than this level with increasing the dark/light  
264 temperature from 0/8 to 4/12 to 8/16 °C ( $p < 0.05$ ), as seen in Fig 3C and 3D.

#### 265 **Dynamic variability of auto-allelopathic effect on the seedling growth**

266 Fig. 4 illustrated the experimental results on three different concentrations of the water  
267 extract of needles and single DHAP affecting the growth of *P. schrenkiana* seedlings at five  
268 dark/light temperature cycles, indicated by the changes of plumule length, radical length and  
269 fresh weight ( $p < 0.05$ ). Depending on concentration and temperature, the auto-allelopathic  
270 effect in each pair of donor (the water extract or single DHAP) and target (plumule length or  
271 radical length or fresh weight) could display the duality of promotion or inhibition. Similar to  
272 the above seed germination, at any given temperature cycle the low concentration of donor  
273 invariably enhanced the growth of *P. schrenkiana* seedlings but the high concentration

274 inevitably reduced the growth, while the intermediate concentration could alter the inhibition  
275 ratio from a negative value (promotion effect) through zero line (no effect) to a positive value  
276 (inhibition effect) with increasing temperature. For the effect of DHAP on the growth of  
277 seedling as an example, the concentration of 0.25 mM could increase the plumule and radical  
278 lengths of the seedlings at 2/10, 4/12 and 6/14 °C ( $p<0.05$ ), slightly lengthen the plumule but  
279 largely shorten the radicle at 8/16 °C ( $p<0.05$ ), and largely cut down both the lengths at  
280 10/18 °C ( $p<0.05$ ), as showed in Fig 4D and 4E. In brief, there always exists an inflection  
281 concentration point of the donor to divide its promotional and inhibitory effect on the growth  
282 of *P. schrenkiana* seedlings at a given temperature, and all such temperature-dependent  
283 inflection points can be connected into a boundary line that drifts downward with the increase  
284 of temperature.

#### 285 **Dynamic variability of auto-allelopathic effect on the viability of root tips**

286 The auto-allelopathic effects of DHAP at three concentrations and five dark/light  
287 temperature cycles on the viability of root tips of *P. schrenkiana* seedlings were illustrated by  
288 fluorescence in Fig. 5, where fresh green and yellow red indicate alive and dying roots,  
289 respectively. As compared with the case in the absence of allelochemical (CK), 0.1 mM  
290 DHAP could significantly enhance the vitality of the seedling roots at the dark/light  
291 temperature cycles 4/12 and 6/14°C, and 0.25 mM DHAP almost give no effect on the vitality  
292 of roots at the temperature below 6/14 °C but a serious damage to the vitality at the  
293 temperature over 8/16 °C, while 0.5 mM DHAP cause a loss of roots vitality even at low  
294 temperature of 2/10 °C until the complete death of roots at high temperature of 10/18 °C. In  
295 general, the relatively low concentration of DHAP at a relatively low temperature could  
296 enhance the viability of roots, but the higher concentration of DHAP at a relatively high  
297 temperature might kill the roots completely. For the influence of DHAP on the viability of  
298 root tips of *P. schrenkiana* seedlings, therefore, there also appears the duality depending on  
299 temperature and concentration, although the inflection points are not easy to determine  
300 quantitatively and the boundary line is difficult to draw clearly.

#### 301 **Dynamic variability of auto-allelopathic effect on the antioxidant activity of enzymes**

302 The vitality of *P. schrenkiana* seedlings is closely related to its physiological property,

303 and thus the synergistic effects of DHAP concentration, incubation temperature and time on  
304 the activities of antioxidant enzymes in *P. schrenkiana* seedlings have been investigated. As  
305 displayed in Fig. 6, the original activities of four antioxidant enzymes SOD, POD, CAT and  
306 GR are about  $45 \text{ U}\cdot\text{g}^{-1}$ ,  $39 \text{ U}\cdot\text{g}^{-1}$ ,  $11 \text{ U}\cdot\text{g}^{-1}$  and  $27 \mu\text{M NADPH}\cdot\text{g}^{-1}$  respectively ( $p<0.05$ ), while  
307 these activities varied significantly with DHAP concentration, incubation temperature and  
308 time.

309 For SOD without DHAP treatment as showed in A1-A5 of Fig. 6, the intrinsic activity  
310 increased with temperature during 0 to 6 days, and then slightly descended as time extended  
311 to 12 days at temperature below  $8/16 \text{ }^\circ\text{C}$  or approached to a stable level at  $10/18 \text{ }^\circ\text{C}$  ( $p<0.05$ ).  
312 For SOD with the treatment of DHAP at different concentrations and temperatures, the  
313 activity corresponding to  $0.1 \text{ mM}$  DHAP went over the intrinsic activity at any temperature  
314 and gently increased with time ( $p<0.05$ ); the activity corresponding to  $0.25 \text{ mM}$  DHAP was  
315 higher than the intrinsic activities at  $2/10$  and  $4/12 \text{ }^\circ\text{C}$  and increased with time, and was  
316 similar to the intrinsic activity at  $6/14 \text{ }^\circ\text{C}$  and any time, while those at  $8/16$  and  $10/18 \text{ }^\circ\text{C}$  went  
317 up in first 3 days and then quickly dropped down to far below the intrinsic activity after 6  
318 days ( $p<0.05$ ); also the activity corresponding to  $0.5 \text{ mM}$  went up significantly over the  
319 intrinsic activity at  $2/10 \text{ }^\circ\text{C}$  during first 6 days and then dropped down to slightly above the  
320 intrinsic activity in 12 days, the activity at  $4/12 \text{ }^\circ\text{C}$  went up to a peak during the first 3 days  
321 and then fell down to close to the intrinsic activity in 12 days, while those at temperatures  
322 over  $6/14 \text{ }^\circ\text{C}$  ascended quickly to the maximums and then descended rapidly to far below the  
323 intrinsic activity after 6 days ( $p<0.05$ ).

324 For POD, CAT and GR without DHAP treatment, their activities at any temperature  
325 generally increased over time, as displayed by the diagrams B1-B5, C1-C5 and D1-D5 in Fig.  
326 6 respectively. For the three enzymes with DHAP treatment, the trends and patterns of  
327 individual activity change with DHAP concentration, incubation temperature and time are  
328 basically similar to those of SOD, regardless of the difference in change extent and  
329 displacement of some turning points. For instance, their activities corresponding to  $0.5 \text{ mM}$   
330 went up over the intrinsic activity at  $2/10 \text{ }^\circ\text{C}$  in 3 days instead of 6 days referring to SOD and  
331 then dropped down to far below rather than slightly above the intrinsic activity referring to  
332 SOD in 12 days ( $p<0.05$ ), as showed in A1-D1 of Fig.6.

333 In conclusion, the allelopathic effect of DHAP on the activities of four antioxidant  
334 enzymes in *P. schrenkiana* seedlings similarly displayed the duality relying on DHAP  
335 concentration and temperature, while time might be able to adjust the degree or even  
336 direction of such dual effects. Compared with the growth of *P. schrenkiana* seeds, seedlings  
337 and roots, however, the response of these antioxidant enzymes to the duality of DHAP  
338 allelopathic effect appeared to show some time delay. In other words, whether the  
339 promotional effect at lower concentration and temperature or the inhibitory effect at higher  
340 concentration and temperature generally required enough time to significantly change the  
341 activities of these antioxidant enzymes.

#### 342 **Dynamic variability of auto-allelopathic effect on the endogenous metabolism of** 343 **hormones**

344 There are further interests to investigate the variability of DHAP allelopathy to the  
345 endogenous metabolism in *P. schrenkiana*, and hence the joint effects of DHAP concentration,  
346 incubation temperature and time on the contents of four hormones including ZT, GA<sub>3</sub>, IAA  
347 and ABA in *P. schrenkiana* seedling have been examined. As demonstrated in Fig.7, the  
348 contents of the four hormones in *P. schrenkiana* seedling also varied significantly with DHAP  
349 concentration, temperature and time. By comparison, the original contents of the hormones  
350 IAA, ZT, GA<sub>3</sub> and ABA are about 18, 2.8, 12 and 0.01ug·g<sup>-1</sup> respectively ( $p<0.05$ ), and the  
351 change patterns of IAA, ZT and GA<sub>3</sub> content show some similarities but are obviously  
352 different from that of ABA content.

353 For hormone IAA in the absence of DHAP, its intrinsic content slowly increased with  
354 time at any temperature, as showed by A1-A5 in Fig.7. In the existence of DHAP at different  
355 concentrations, the content of IAA responding to 0.1 mM DHAP rapidly increased with time  
356 at any temperature and went to much higher than the intrinsic content at 10/18 °C and 12  
357 days ( $p<0.05$ ); the content responding to 0.25 mM DHAP was slightly higher than the  
358 intrinsic content at 2/10 and 4/12 °C and gently increased with time, that at 6/14 °C was  
359 almost the same as the intrinsic value at any time, while those at 8/16 and 10/18 °C slowly  
360 climbed in first 3 days and then quickly slid down to far below the intrinsic values after 6  
361 days ( $p<0.05$ ); also the content responding to 0.5 mM DHAP went up to a peak above that  
362 responding to 0.25 mM in 3 days at any temperature and then rapidly fell down to far below

363 the intrinsic content after 6 days ( $p<0.05$ ).

364 For hormone ZT in the absence of DHAP, its intrinsic content gradually increased with  
365 time at any temperature, as showed by B1-B5 in Fig.7. In the existence of DHAP at different  
366 concentrations, the content of ZT responding to 0.1 mM DHAP quickly increased with time  
367 and went up over the intrinsic content at any time and temperature ( $p<0.05$ ); the content  
368 responding to 0.25 mM DHAP was higher than the intrinsic content but lower than that  
369 responding to 0.1 mM DHAP at 2/10 or 4/12 °C and increased with time, and slightly higher  
370 than the intrinsic content at 6/14 °C and any time, while those at 8/16 and 10/18 °C slowly  
371 climbed in first 3 days and then quickly slid down to far below the intrinsic values after 6  
372 days ( $p<0.05$ ); also the content responding to 0.5 mM DHAP went up to a peak higher than  
373 that responding to 0.25 mM in 3 days at temperature above 6/14 °C and then rapidly fell  
374 down to far below the intrinsic content after 6 days ( $p<0.05$ ).

375 For hormone GA<sub>3</sub> in the absence or existence of DHAP as showed by C1-C5 in Fig.7,  
376 the patterns and trends of its content change with DHAP concentration, incubation  
377 temperature and time are almost the same as those of IAA, and also roughly similar to those  
378 of ZT.

379 For hormone ABA in absence or existence of DHAP as showed by D1-D5 in Fig.7,  
380 however, the pattern and trend of its content changing with DHAP concentration, incubation  
381 temperature and time is obviously different from those of the above three hormones. As seen,  
382 its intrinsic content and those responding to three concentrations of DHAP generally  
383 increased with temperature and time. In detail, the content responding to 0.1 mM DHAP is  
384 slightly lower than the intrinsic content at any temperature and time ( $p<0.05$ ); that responding  
385 to 0.5 mM DHAP is much higher than the intrinsic content at any temperature and time,  
386 while that responding to 0.25 mM at any time is slightly lower than the intrinsic content at  
387 2/10 °C, close to the intrinsic content at 4/12 °C, slightly higher than the intrinsic content at  
388 6/14 °C, and significantly higher than the intrinsic content but slightly lower than the content  
389 responding to 0.5 mM DHAP at 8/16 and 10/18 °C ( $p<0.05$ ). Contrary to the cases of IAA,  
390 ZT and GA<sub>3</sub>, in particular, low concentration of DHAP (0.1 mM) can slightly reduce the ABA  
391 content at any temperature and time, while high concentration of DHAP (0.5 mM) can  
392 significantly enhance the ABA content without a sudden and sharp drop at high temperature

393 and any time ( $p < 0.05$ ).

394 In brief, the allelopathic effect of DHAP on the contents of four hormones in *P.*  
395 *schrenkiana* seedlings also demonstrated the duality depending on DHAP concentration and  
396 temperature, while time might magnify the extent of influence in most occasions. In general,  
397 low concentration of DHAP could gently enhance the contents of IAA, ZT and GA<sub>3</sub> but  
398 slightly reduce that of ABA at any temperature and time, while high concentration of DHAP  
399 could significantly reduce the contents of IAA, ZT and GA<sub>3</sub> but enhance that of ABA at high  
400 temperature and long time.

#### 401 **Discussion**

402 Global warming in conjunction with other environmental stressors and various biotic or  
403 abiotic interferences is increasingly jeopardizing the ecosystem of boreal forests (Gauthier *et*  
404 *al.*, 2015). The existence of allelopathy has been gradually recognized by plant ecologists and  
405 chemists, but as a potential and invisible force to drive the succession of boreal forest  
406 (Inderjit *et al.*, 2011), its vital role in regeneration of various plants such as *P. schrenkiana*  
407 have not attracted widespread attention, and in particular, its dynamic mechanism and  
408 ecological significance have not been fully understood yet. The main reason for that is due to  
409 the lack of innovative thinking and scientific methods. So far, most filed investigations have  
410 mainly focused on phenotypic and morphologic changes of plants (Zuo *et al.*, 2007; Farooq *et*  
411 *al.*, 2014), but hardly enter into the allelochemistry of plant secondary metabolites due to the  
412 complexity and invisibility. On the other hand, few studies in lab could clearly explain  
413 allelopathy in natural settings due to the difficulties in adopting representative samples,  
414 simulating geographical climate and ecological environment in the field, indentifying key  
415 allelochemicals and quantitatively evaluating allelopathic effects. In this study, we  
416 established a scientific methodology to simultaneously probe morphologic change,  
417 biochemistry of plant primary physiologic processes and allelochemistry of plant secondary  
418 metabolites under the simulated field conditions, accurately identify and quantitatively  
419 evaluate the allelopathic effects on plant growth, and insightfully reveal the synergistic  
420 effects of allelopathy, climate and other factors on plant behavioral ecology, Such approach  
421 may overcome the weakness of empirical, phenomenological and impractical studies in this  
422 area. As a result, this paper provides a replicable and successful example to comprehensively

423 explain temperature- dependence of DHAP allelopathy duality and its influence on the  
424 growth of *P. schrenkiana* seeds and seedlings.

425 From a scientific point of view, the terminology “duality” generally refers to a basic  
426 feature of the interactions among various processes such as forests evolution. Undoubtedly,  
427 the accumulation of allelopathic substances in soil can potentially play an important role in  
428 plant adaption to environment and forest evolution. A lower cumulative amount of  
429 allelochemicals such as DHAP of 0.1 mM in the soil could promote the germination of seeds,  
430 accelerate the growth rate of seedlings, and consequently enhance the survival probability  
431 and competition level of *P. schrenkiana* population in the early stage of regeneration. By  
432 contraries, however, a higher cumulative amount of allelochemicals such as DHAP of 0.5  
433 mM in the soil could inhibit the germination of seeds, decelerate the growth rate of seedlings,  
434 and thus reduce the survival probability and competitive ability of *P. schrenkiana* population,  
435 just appearing a “drive away” effect on the regenerated population. At the same time, the  
436 periodic fire combustion may play the role of a surface cleaner to reduce the accumulated  
437 amount of allelochemicals in topsoil and maintain the stability and balance of ecosystem  
438 (Wang *et al.*, 2006). Originated from scientific thinking here, we have fully explored and  
439 quantitatively evaluated the dual effects of key allelochemical DHAP in the exudates of *P.*  
440 *schrenkiana* needles on the growth of its seed and seedling as well as the endogenous  
441 metabolism and antioxidant enzyme activities. In the first, an inflection concentration of  
442 DHAP was identified at any given temperature, and then it was demonstrated that depending  
443 on its concentration below or over this inflection point, DHAP might give a promotional or  
444 inhibitory effect on the growth of *P. schrenkiana* seeds and seedlings. In the second, the  
445 temperature-dependence of such DHAP allelopathic effects was verified to indicate that  
446 increasing temperature would inevitably shift the inflection concentration of DHAP from a  
447 higher level to a lower level. Consequently, these findings on the duality of DHAP  
448 allelopathy not only give a specific annotation to the universality of natural development  
449 process from quantitative change to qualitative change, but also provide a scientific guidance  
450 for the prospective researches and practices in the evolution of forest ecosystem in the  
451 context of global warming.

452 In the typical case given here, a scientific explanation to the temperature dependence of

453 DHAP allelopathy duality and its influence on the growth of *P. schrenkiana* seeds and  
454 seedlings expands the understandings of allelopathic effects on forest evolution during the  
455 process of global climate change, which will help us penetrate through the apparent  
456 interaction between *P. schrenkiana* regeneration and climate change to find the common  
457 mechanism of morphological, biochemical, and ecological changes in forest evolution under  
458 global warming. Finally, this paper demonstrates our aspirations and efforts to scientifically  
459 explore the real problems of boreal forest degradation by integrating field investigation with  
460 experimental analysis and simulation. Beyond all doubt, with the continuous improvement of  
461 research methods and techniques, the role of allelopathy in plant-mediated interference to  
462 natural ecosystem is expected to become clearer in the coming years.

### 463 **Acknowledgments**

464 The authors are grateful to the Natural Science Foundation of China (NSFC, Project No.  
465 31670631), and Department of Science and Technology of Ningbo (DSTNB, Project No.  
466 2017C110004, 2017C10017, 2017C10070) for the financial support of the work. Conceived  
467 and designed the experiments: Qiang Wang and Cun-de Pan. Performed the experiments and  
468 analyzed the data: Xiao Ruan, Li Yang, Min-fen Yu. Contributed reagents/materials/analysis  
469 tools: Zhao-hui Li, Cun-de Pan, and De-an Jiang. Contributed to the writing of the  
470 manuscript: Qiang Wang and Ying-xian Zhao.

### 471 **References**

- 472 **Bias HP, Walker TS, Stermitz FR, Vivanco, JM.** 2002. Enantiomeric-dependent phytotoxic  
473 and antimicrobial activity ( $\pm$ )-catechin, A rhizosecreted racemic mixture from spotted  
474 knapweed, *Plant Physiology* **128**, 1173-1179.
- 475 **Bais HP, Vepachedu R, Gilroy S, Callaway RM, Vivanco JM.** 2003. Allelopathy and  
476 exotic plant invasion: From molecules and genes to species interactions. *Science* **301**(5),  
477 1377-1380.
- 478 **Blanco JA.** 2007. The representation of allelopathy in ecosystem-level forest models.  
479 *Ecological Modelling* **209**, 65-77.
- 480 **Bonanomi G, Incerti G, Abd El-Gawad AM, Cesarano G, Sarker TC, Saulino L,**  
481 **Lanzotti V, Saracino A, Rego FC, Mazzoleni S.** 2018. Comparing chemistry and  
482 bioactivity of burned vs. decomposed plant litter: different pathways but same result?  
483 *Ecology* **99** (1), 158-171.



- 484 **Chai TT, Ooh KF, Ooi PW, Chue PS, Wong FC.** 2013. *Leucaena leucocephala* leachate  
485 compromised membrane integrity, respiration and antioxidative defence of water  
486 hyacinth leaf tissues. *Botanical Studies* **54**(1), 8.
- 487 **Cheng F, Cheng Z, Meng H, Tang X.** 2016. The garlic allelochemical diallyl disulfide  
488 affects tomato root growth by influencing cell division, phytohormone balance and  
489 expansin gene expression. *Frontiers in Plant Science* **7**(1020), 1199.
- 490 **Cummings JA, Parker IM, Gilbert GS.** 2012. Allelopathy: a tool for weed management in  
491 forest restoration. *Plant Ecology* **213**(12), 1975-1989.
- 492 **Farooq M, Hussain T, Wakeel A, Cheema ZA.** 2014. Differential response of maize and  
493 mungbean to tobacco allelopathy. *Experimental Agriculture* **50**(4), 611-624.
- 494 **Giannopolitis CN, Ries SK.** 1977. Superoxide dismutases I. Occurrence in higher plants.  
495 *Plant Physiology* **59**, 309-314.
- 496 **Gauthier S, Bernier P, Kuuluvainen T, Shvidenko AZ, Schepaschenko DG.** 2015. Boreal  
497 forest health and global change. *Science*, **349**(6250), 819-822.
- 498 **Hu Y, Na X, Li J, Yang L, You J, Liang X, Wang J, Peng L, Bi Y.** 2015. Narciclasine, a  
499 potential allelochemical, affects subcellular trafficking of auxin transporter proteins and  
500 actin cytoskeleton dynamics in *Arabidopsis* roots. *Planta* **242**(6), 1349-1360.
- 501 **Inderjit, Wardle DA, Karban R, Callaway RM.** 2011. The ecosystem and evolutionary  
502 context of allelopathy. *Trends in Ecology and Evolution* **26**, 655-662.
- 503 **ISTA.** 1993. *ISTA International Rules for Seed Testing*. International Seed Testing  
504 Association: Bassersdorf, Switzerland, 141-159.
- 505 **Kochba J, Lavee S, Spiegel-Roy P.** 1977. Differences in peroxidase activity and isoenzymes  
506 in embryogenic and non-embryogenic 'Shamouti' orange ovular callus lines. *Plant Cell*  
507 and *Physiology* **18**, 463-467.
- 508 **Lee DH, Kim YS, Lee CB.** 2001. The inductive responses of the antioxidant enzymes by salt  
509 stress in the rice (*Oryza sativa* L.). *Journal of Plant Physiology* **158**, 737-745.
- 510 **Li ZH, Wang Q, Liao JJ, Ruan X, Pan CD, Jiang DA, Luo CC.** 2009. Elementary  
511 identification of potential autotoxins from *Picea Schrenkiana* litters. *Chinese Journal of*  
512 *Analysis Chemistry* **37**, 888-892.
- 513 **Mallik AU.** 2008. In *Allelopathy in sustainable agriculture and forestry -Allelopathy in*  
514 *forested ecosystems*. In: Zeng, R.S., Mallik A.U., Luo S.M. eds. *International*  
515 *Symposium on Allelopathy Research and Application*, Sanahui, China, 363-386.

- 516 **Meiners SJ, Kong CH, Ladwig LM, Pisula NL, Lang KA.** 2012. Developing an ecological  
517 context for allelopathy. *Plant Ecology* **213**(12), 1861-1867.
- 518 **Pan J, Zhu M, Chen H.** 2001. Aluminum-induced cell death in root-tip cells of barley.  
519 *Environmental and Experimental Botany* **46**, 71-79.
- 520 **Pellissier F, Souto XC.** 1999. Allelopathy in northern temperate and boreal semi-natural  
521 woodland. *Critical Reviews in Plant Sciences* **18**, 637-652.
- 522 **Reich PB, Sendall KM, Stefanski A, Wei X, Rich RL, Montgomery RA.** 2016. Boreal and  
523 temperate trees show strong acclimation of respiration to warming. *Nature* **531** (7596),  
524 633-636.
- 525 **Rice EL.** 1984. *Allelopathy* (2nd edition). New York, Academic press, 1-3.
- 526 **Ruan X, Li ZH, Wang Q, Pan CD, Jiang DA, Wang GG.** 2011. Autotoxicity and  
527 allelopathy of 3, 4-dihydroxyacetophenone isolated from *Picea schrenkiana* needles.  
528 *Molecules* **16**(10), 8874-8893
- 529 **Ruan X, Pan CD, Liu R, Li ZH, Li SL, Jiang DA, Zhang JC, Wang G, Zhao YX, Wang**  
530 **Q.** 2016. Effects of climate warming on plant autotoxicity in forest evolution -A case  
531 simulation analysis for *Picea schrenkiana* regeneration. *Ecology and Evolution* **6**(16),  
532 5854-5866.
- 533 **Subrahmaniam HJ, Libourel C, Journet EP, Morel JB, Muños S, Niebel A, Raffaele S,**  
534 **Roux F.** 2018. The genetics underlying natural variation of plant-plant interactions, a  
535 beloved but forgotten member of the family of biotic interactions. *Plant Journal* **93** (4),  
536 747-770.
- 537 **Teerarak M, Charoenying P, Laosinwattana C.** 2012. Physiological and cellular  
538 mechanisms of natural herbicide resource from *Aglaia odorata* Lour. on bioassay plants.  
539 *Acta Physiologiae Plantarum* **34**(4), 1277-1285.
- 540 **Vazquez DP, Gianoli E, Morris WF, Bozinovic F.** 2017. Ecological and evolutionary  
541 impacts of changing climatic variability. *Biological Reviews* **92** (1), 22-42.
- 542 **Wang Q, Ruan X, Pan CD, Xu NY, Luo X, Huang MM.** 2006. Need for sustainability  
543 policy - a case study of the natural forest conservation program (nfc) in the western  
544 region of tianshan mountain, China. *Forestry Chronicle* **82**(1), 31-39.
- 545 **Yang L, Ruan X, Jiang DA, Zhang JH, Pan CD, Wang Q.** 2017. Physiological effects of  
546 autotoxicity due to DHAP stress on *Picea schrenkiana* regeneration. *PLoS ONE* **12**(5),

547 e0177047

548 **Yu JQ, Ye SF, Zhang MF.** 2005. Effects of root exudates and aqueous root extracts of  
549 cucumber (*Cucumis sativus*) and allelochemicals, on photosynthesis and antioxidant  
550 enzymes in cucumber. *Biochemical Systematics and Ecology* **31**(2), 129-139.

551 **Zeng RS, Luo SM, Shi YH.** 2001. Physiological and biochemical mechanism of allelopathy  
552 of secalonin acid on higher plants. *Agronomy Journal* **93**(1), 72-79.

553 **Zuo SP, Ma YQ, Inanaga S.** 2007. Allelopathy variation in dryland winter wheat (*Triticum*  
554 *aestivum*) accessions grown on the loess plateau of china for about fifty years. *Genetic*  
555 *Resources & Crop Evolution* **54**(6), 1381-1393.

556 **Zhang J, Li J, Cui S, Wei J.** 1990. Response of cell protective enzymes in corn leaf to water  
557 stress at seedling stage. *Acta Agriculture Boreali-Occidentalis Sinica* **5**, 19-23.

558 **Zhang XS, Zhang YS.** 1963. Regeneration pattern of *Picea schrenkiana* forest and  
559 regeneration failure in cutting site. *Xinjiang Forest Science* **1**, 1-5 (in Chinese).

560

561

562

563

564

565

566

567

568

569

570

571

572

573

574

575

576

577

578 Fig.1 Distribution of boreal forest and regeneration of *P. schrenkiana*  
579 A: Distribution of global boreal forest; B: Regeneration of *P. schrenkiana* in fallen woods (50  
580 years); C: Regeneration of *P. schrenkiana* over sporadic fire spots; D: Regeneration of *P.*  
581 *schrenkiana* after in 5 -year after the wildfire event; E: Regeneration of *P. schrenkiana* after  
582 in 10 -year after the wildfire event  
583 Fig.2 Chromatogram of four phytohormones and DHAP by UPLC  
584 A: Standard chromatogram; B: Sample chromatogram.  
585 Fig.3 The effect of water extract and DHAP treatment on seed germination of *P. schrenkiana*  
586 in different temperature ranges  
587 A-B: Water extract on germination rate and germination vigor; C-D: DHAP on germination  
588 rate and germination vigor  
589 Fig.4 The effect of water extract and DHAP treatment on seedlings growth of *P. schrenkiana*  
590 in different temperature ranges  
591 A-C: Water extract on plumule length, radicle length and fresh weight; D-F: DHAP on  
592 plumule length, radicle length and fresh weight  
593 Fig.5 The effect of DHAP on root tips viability of *P. schrenkiana* seedlings in different  
594 temperature ranges tested by FDA-PI staining  
595 Fig.6 The change of antioxidant enzymes activities in *P. schrenkiana* seedlings treated by  
596 DHAP at different temperature  
597 A1-A5: DHAP on SOD activity at 2/10°C, 4/12°C, 6/14°C, 8/16°C, and 10/18°C; B1-B5:  
598 DHAP on POD activity at 2/10°C, 4/12°C, 6/14°C, 8/16°C, and 10/18°C; C1-C5:DHAP on  
599 CAT activity at 2/10°C, 4/12°C, 6/14°C, 8/16°C, and 10/18°C; D1-D5: DHAP on GR activity  
600 at 2/10°C, 4/12°C, 6/14°C, 8/16°C, and 10/18°C  
601 Fig.7 The change of endogenous plant hormones in *P. schrenkiana* seedlings treated by  
602 DHAP at different temperature  
603 A1-A5: DHAP on IAA content at 2/10□, 4/12□, 6/14□, 8/16□, and 10/18□; B1-B5: DHAP  
604 on ZT content at 2/10□, 4/12□, 6/14□, 8/16□, and 10/18□; C1-C5: DHAP on GA3 content  
605 at 2/10□, 4/12□, 6/14□, 8/16□, and 10/18□; D1-D5:DHAP on ABA content at 2/10□,  
606 4/12□, 6/14□, 8/16□, and 10/18□  
607  
608

609

610 Fig.1

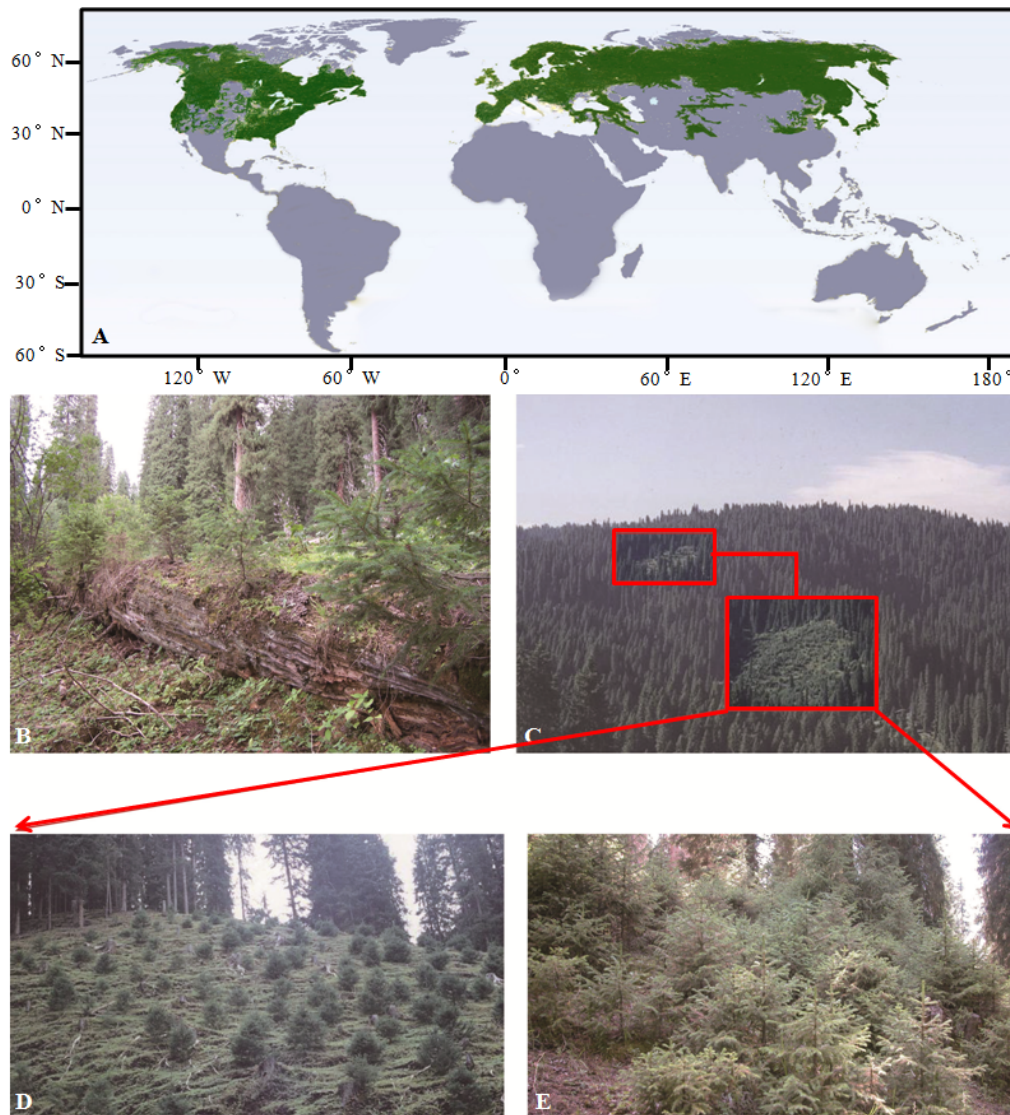

611

612

613

614

615

616

617

618

619

620

621 Fig.2

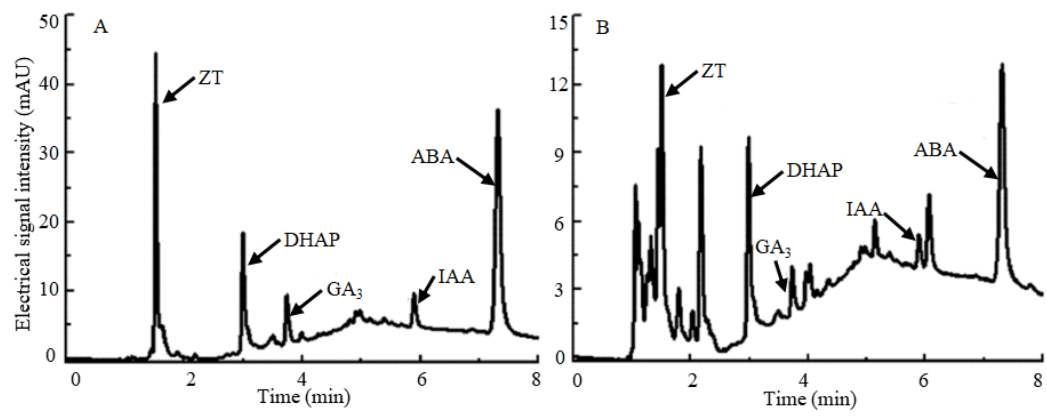

622

623

624

625

626

627 Fig.3

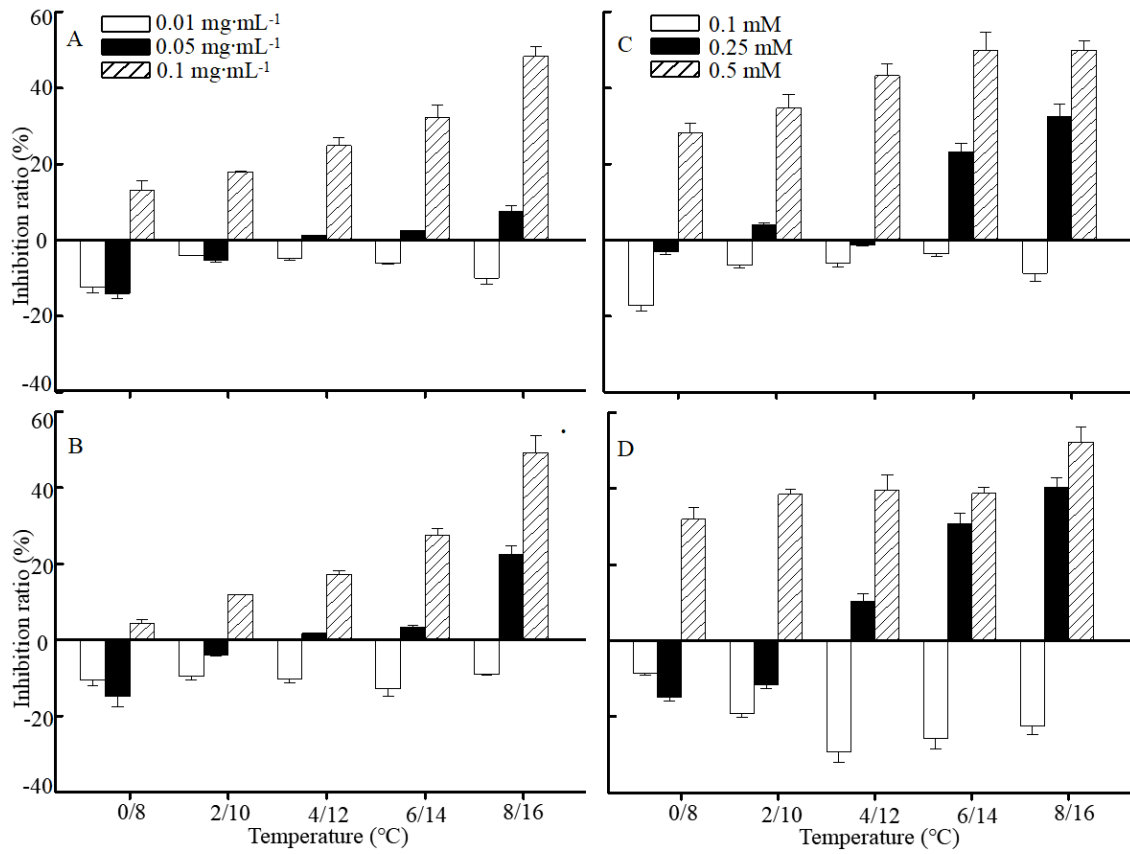

628

629

630

631

632

633 Fig.4

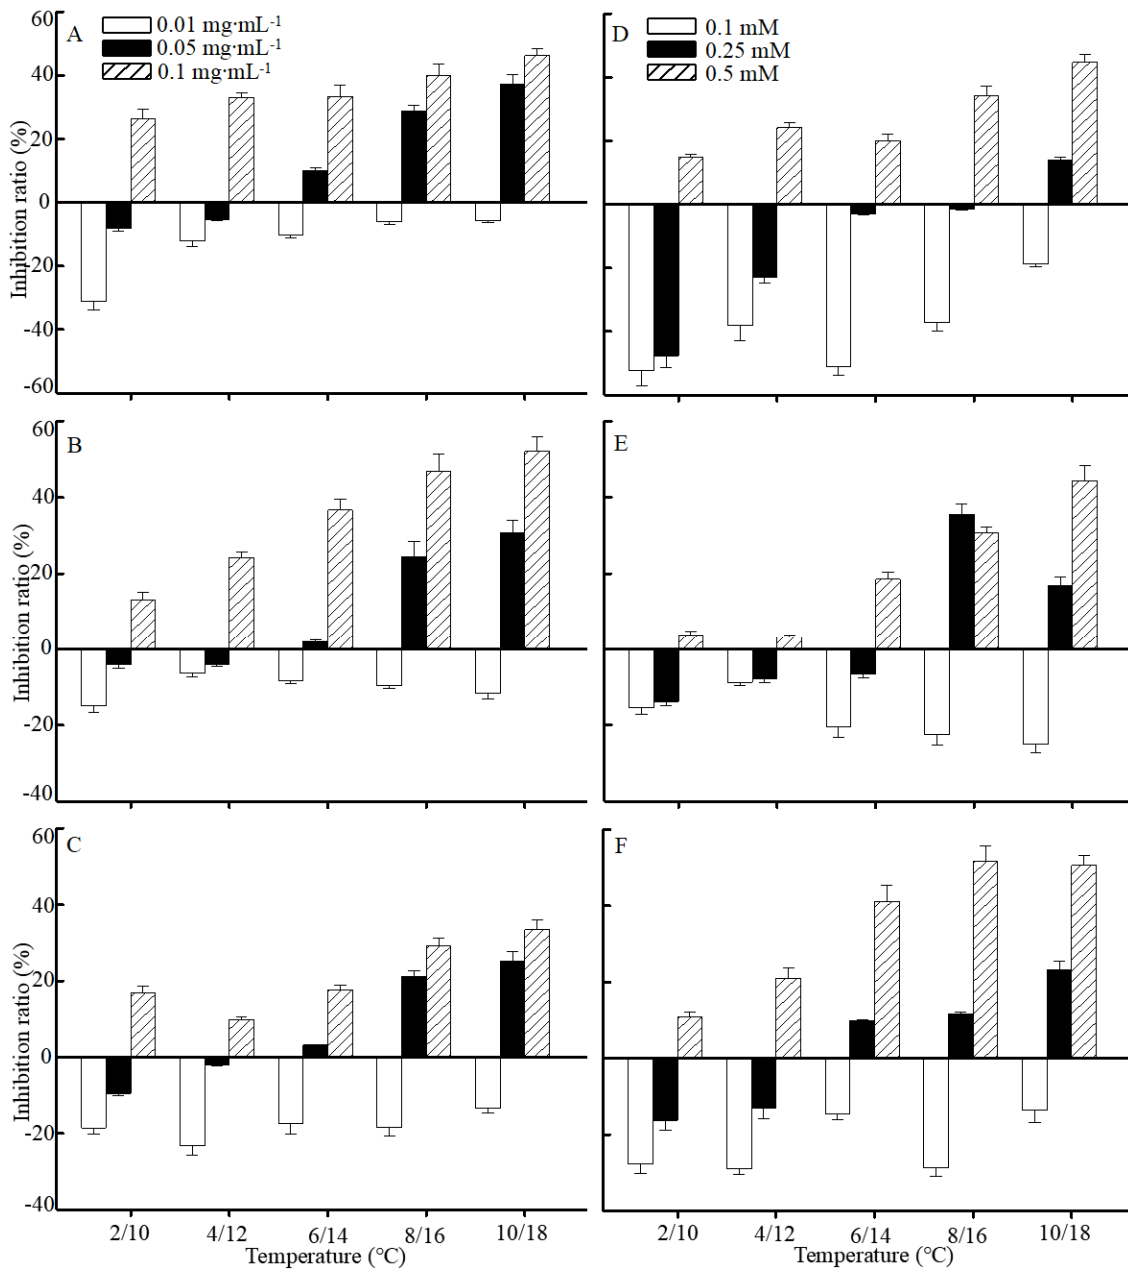

634

635



636

637 Fig.5

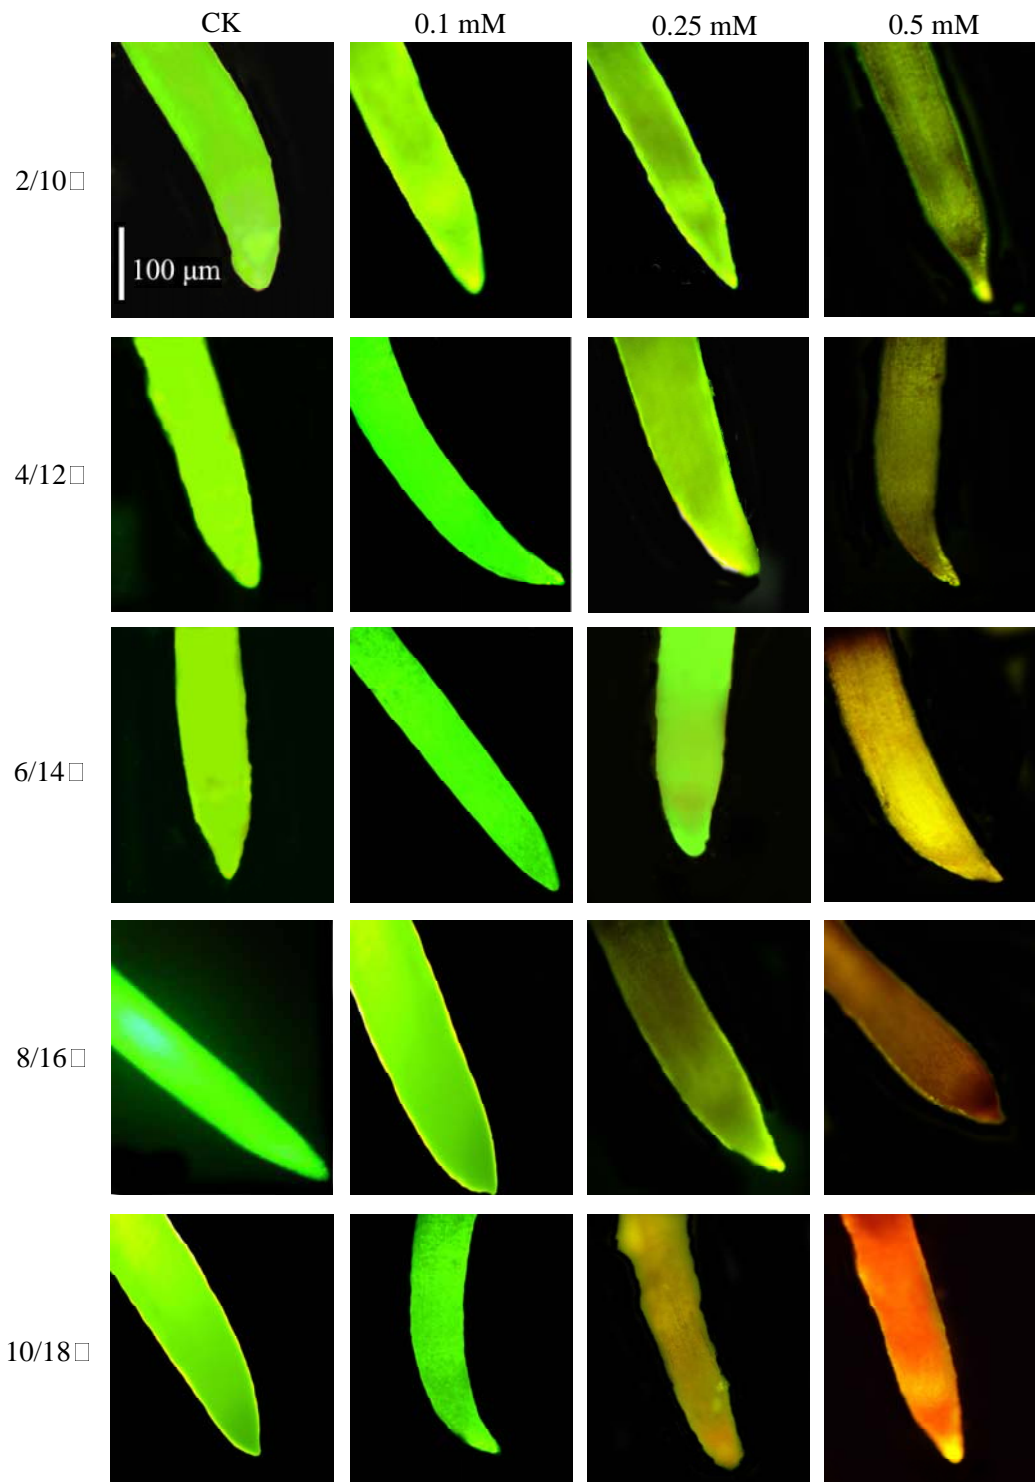

638

639

640 Fig.6

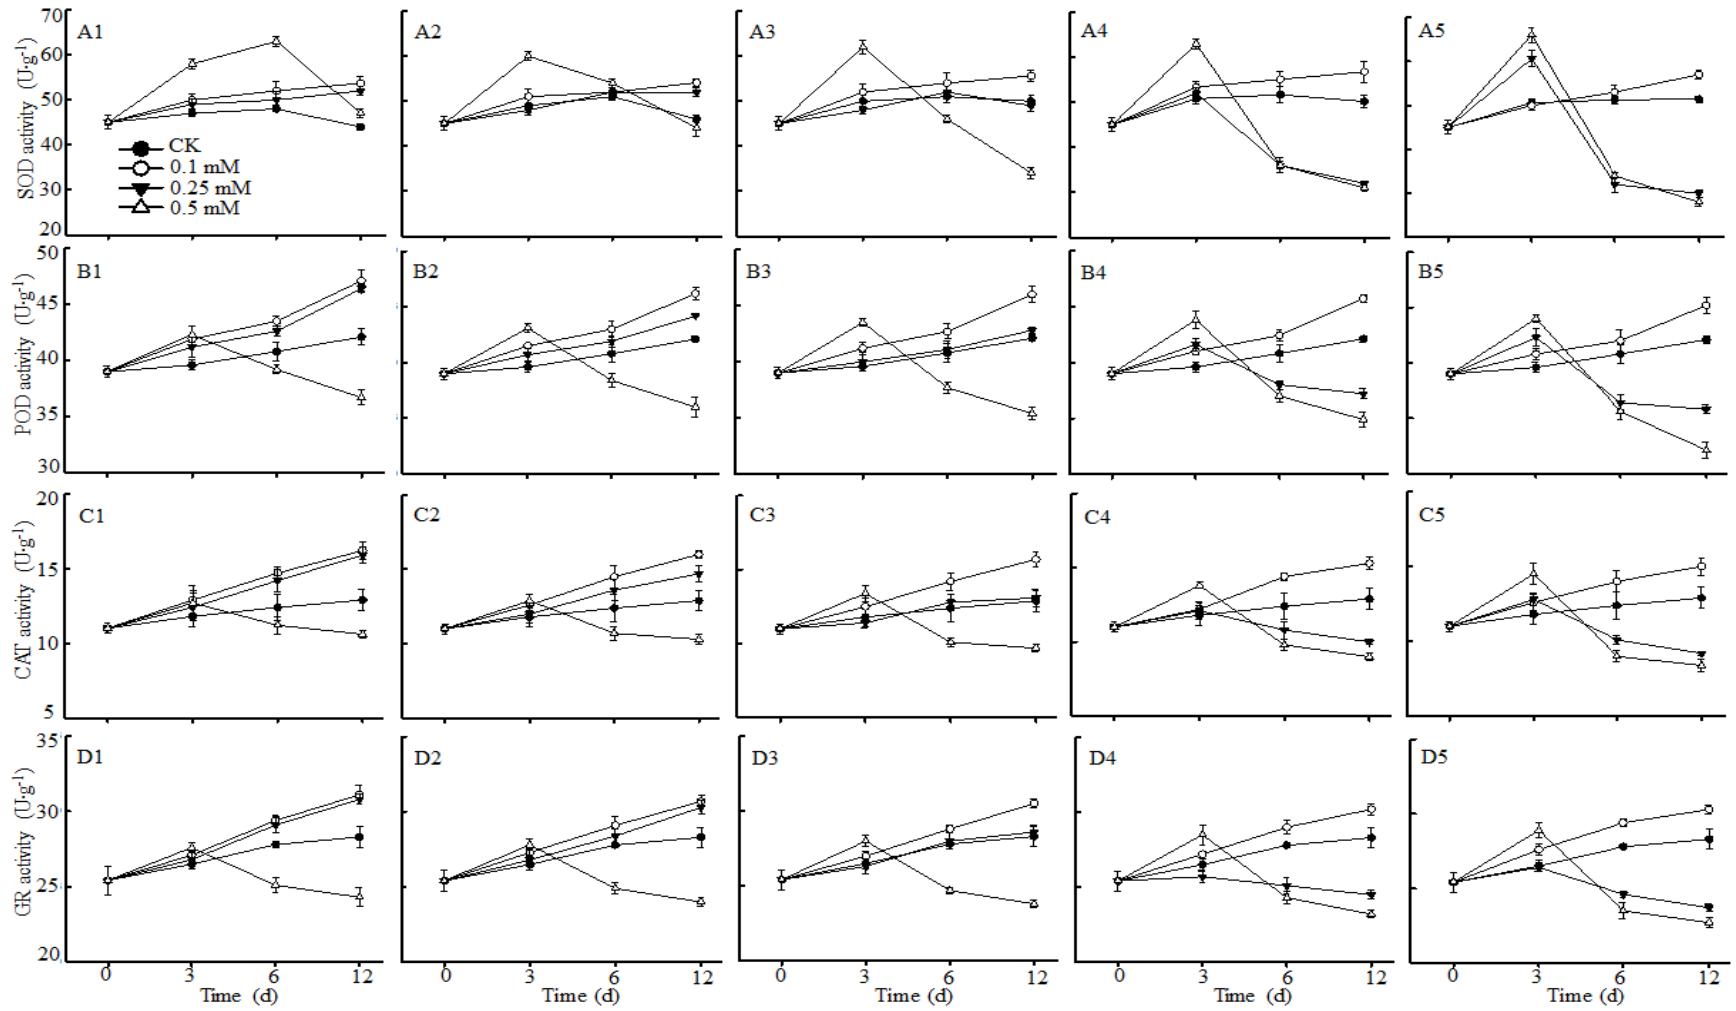

641

642 Fig.7

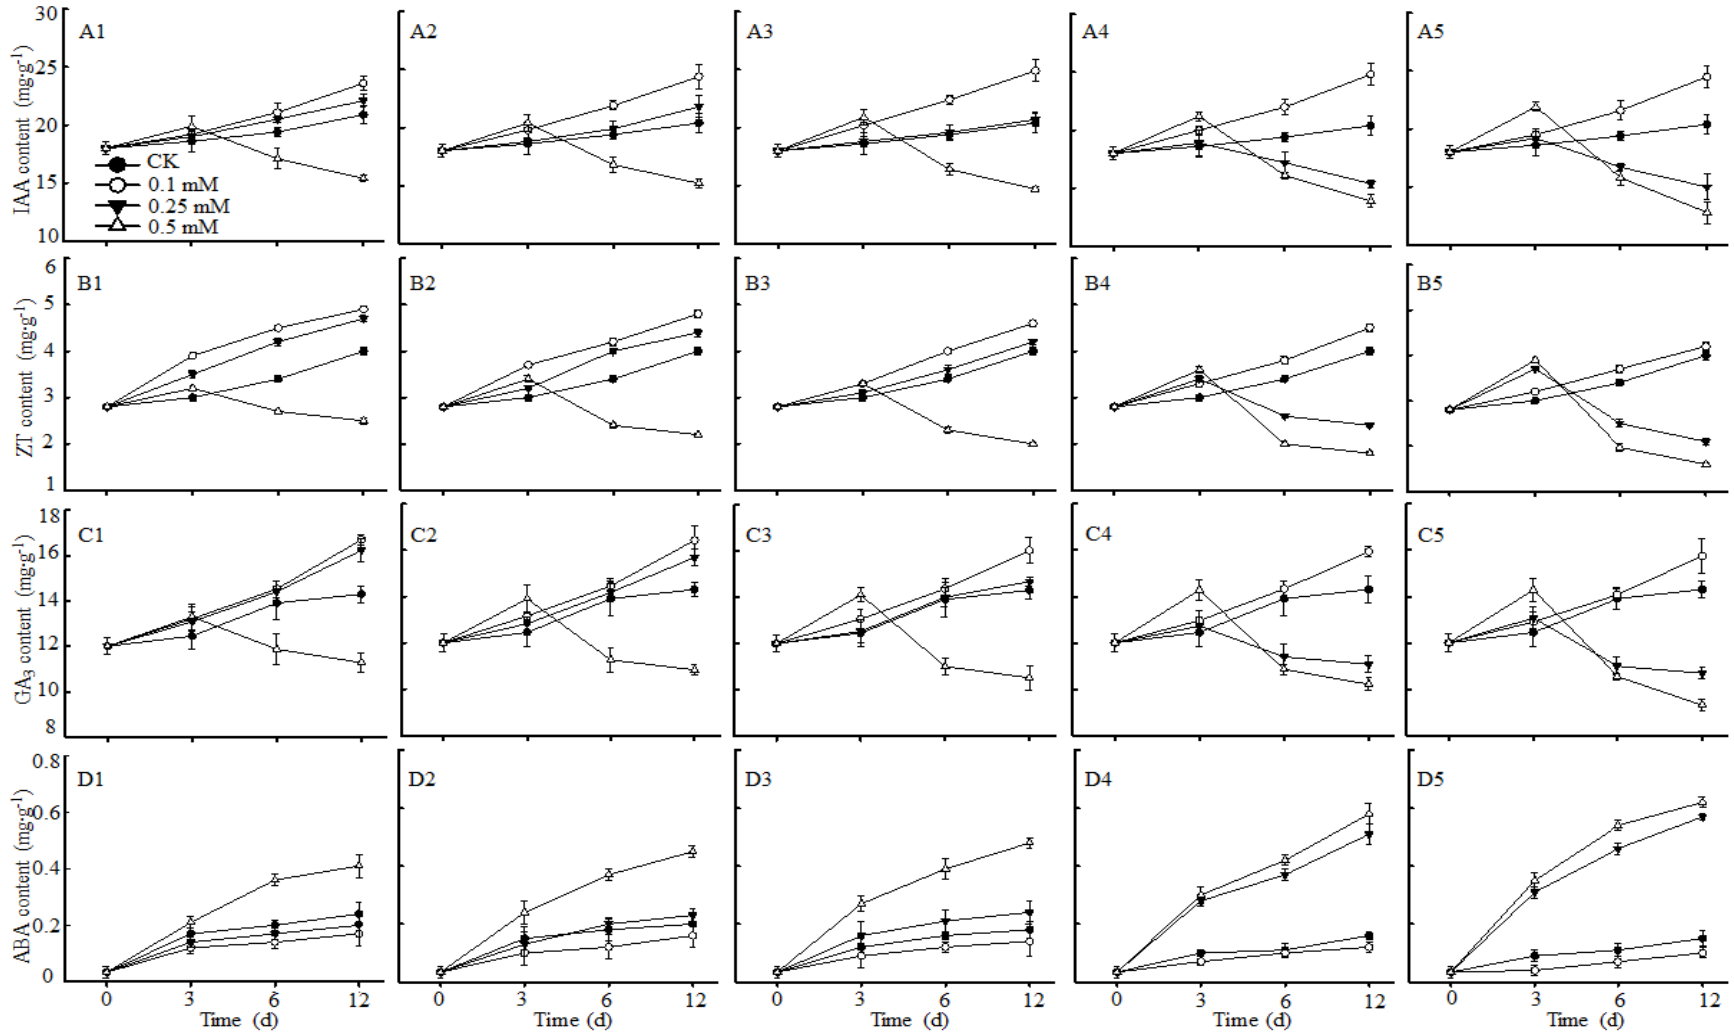

643
